# Supplementary material for: Four New Briarane Diterpenoids from Taiwanese Gorgonian Junceella fragilis
Source: MDPI journal article supplement (doi:10.3390/md11062042), 2013-06-10
Supplement: s2 [file s2]

marinedrugs-11-02042-s001.mol
  corina  04141423023D 1   1.00000     0.00000 
CORINA 3.49 0023  12.04.2013
 41 43  0  0  0  0  0  0  0  0999 V2000
   -0.0392    1.6323   -1.2766 C   0  0  0  0  0  0  0  0  0  0  0  0
   -0.3254    0.1595   -1.0090 C   0  0  0  0  0  0  0  0  0  0  0  0
    1.4578    1.9298   -1.4263 C   0  0  0  0  0  0  0  0  0  0  0  0
    1.8553    3.0142   -0.4611 C   0  0  0  0  0  0  0  0  0  0  0  0
    2.7511    2.8632    0.5017 C   0  0  0  0  0  0  0  0  0  0  0  0
    3.5091    1.6014    0.7719 C   0  0  0  0  0  0  0  0  0  0  0  0
    2.6191    0.3762    0.9299 C   0  0  0  0  0  0  0  0  0  0  0  0
    1.2630    0.7382    1.5202 C   0  0  0  0  0  0  0  0  0  0  0  0
    0.2739   -0.4212    1.4321 C   0  0  0  0  0  0  0  0  0  0  0  0
   -0.8034   -0.1569    0.3810 C   0  0  0  0  0  0  0  0  0  0  0  0
   -0.4326   -0.5682    2.7937 C   0  0  0  0  0  0  0  0  0  0  0  0
   -1.3723   -1.7692    2.8063 C   0  0  0  0  0  0  0  0  0  0  0  0
   -2.4202   -1.6803    1.7002 C   0  0  0  0  0  0  0  0  0  0  0  0
   -1.7424   -1.3531    0.3871 C   0  0  0  0  0  0  0  0  0  0  0  0
   -0.6280    2.0298   -2.6520 C   0  0  0  0  0  0  0  0  0  0  0  0
    0.5468    2.4608   -3.4892 C   0  0  0  0  0  0  0  0  0  0  0  0
    1.6729    2.4040   -2.7838 O   0  0  0  0  0  0  0  0  0  0  0  0
   -1.9693   -2.0856   -0.6683 C   0  0  0  0  0  0  0  0  0  0  0  0
   -1.6097    3.1913   -2.4807 C   0  0  0  0  0  0  0  0  0  0  0  0
    0.4758    2.8099   -4.6439 O   0  0  0  0  0  0  0  0  0  0  0  0
    3.0239    4.0395    1.3636 C   0  0  0  0  0  0  0  0  0  0  0  0
    2.3377    5.0376    1.2645 O   0  0  0  0  0  0  0  0  0  0  0  0
   -0.6133    2.4883   -0.2831 O   0  0  0  0  0  0  0  0  0  0  0  0
    1.0013   -1.7370    1.1498 C   0  0  0  0  0  0  0  0  0  0  0  0
    1.4507    1.1128    2.9185 O   0  0  0  0  0  0  0  0  0  0  0  0
    1.0255    2.3320    3.2850 C   0  0  0  0  0  0  0  0  0  0  0  0
    1.2995    2.8384    4.6777 C   0  0  0  0  0  0  0  0  0  0  0  0
    0.5127    4.1290    4.9151 C   0  0  0  0  0  0  0  0  0  0  0  0
    0.8682    1.7831    5.6981 C   0  0  0  0  0  0  0  0  0  0  0  0
    2.7957    3.1173    4.8338 C   0  0  0  0  0  0  0  0  0  0  0  0
    0.4230    3.0236    2.4984 O   0  0  0  0  0  0  0  0  0  0  0  0
    0.7901   -0.6560   -1.4260 O   0  0  0  0  0  0  0  0  0  0  0  0
   -0.1401   -0.8207   -3.4238 O   0  0  0  0  0  0  0  0  0  0  0  0
    0.7779   -1.1044   -2.6911 C   0  0  0  0  0  0  0  0  0  0  0  0
    1.9091   -1.9616   -3.1977 C   0  0  0  0  0  0  0  0  0  0  0  0
    4.0329    4.0012    2.2566 O   0  0  0  0  0  0  0  0  0  0  0  0
    4.3104    5.2229    2.9906 C   0  0  0  0  0  0  0  0  0  0  0  0
   -1.1856    0.6409    3.0770 O   0  0  0  0  0  0  0  0  0  0  0  0
   -1.2966    0.0185    5.1945 O   0  0  0  0  0  0  0  0  0  0  0  0
   -1.5984    0.8195    4.3417 C   0  0  0  0  0  0  0  0  0  0  0  0
   -2.4382    2.0190    4.6980 C   0  0  0  0  0  0  0  0  0  0  0  0
  1  2  1  0      
  1  3  1  0      
  3  4  1  0      
  4  5  2  0      
  5  6  1  0      
  6  7  1  0      
  7  8  1  0      
  8  9  1  0      
  9 10  1  0      
  2 10  1  0      
  9 11  1  0      
 11 12  1  0      
 12 13  1  0      
 13 14  1  0      
 14 10  1  0      
  1 15  1  0      
 15 16  1  0      
 16 17  1  0      
 14 18  2  0      
 15 19  1  0      
  3 17  1  0      
 16 20  2  0      
  5 21  1  0      
 21 22  2  0      
  1 23  1  0      
  9 24  1  0      
  8 25  1  0      
 25 26  1  0      
 26 27  1  0      
 27 28  1  0      
 27 29  1  0      
 27 30  1  0      
 26 31  2  0      
  2 32  1  0      
 32 34  1  0      
 33 34  2  0      
 34 35  1  0      
 21 36  1  0      
 36 37  1  0      
 11 38  1  0      
 38 40  1  0      
 39 40  2  0      
 40 41  1  0      
M  STY  1   1 SUP
M  SLB  1   1   1
M  SAL   1  4  32  33  34  35
M  SBL   1  1  34
M  SMT   1 OAc
M  SBV   1 34   -8.4814    4.1262
M  STY  1   2 SUP
M  SLB  1   2   2
M  SAL   2  2  36  37
M  SBL   2  1  38
M  SMT   2 OMe
M  SBV   2 38   -7.2617    4.6316
M  STY  1   3 SUP
M  SLB  1   3   3
M  SAL   3  4  38  39  40  41
M  SBL   3  1  40
M  SMT   3 OAc
M  SBV   3 40   -8.3344    4.8371
M  END
$$$$
