# Supplementary material for: Four New Briarane Diterpenoids from Taiwanese Gorgonian Junceella fragilis
Source: MDPI journal article supplement (doi:10.3390/md11062042), 2013-06-10
Supplement: s3 [file s3]

marinedrugs-11-02042-s001.mol
  ChemDraw01301415102D

 41 43  0  0  0  0  0  0  0  0999 V2000
    0.1984   -1.7845    0.0000 C   0  0  0  0  0  0  0  0  0  0  0  0
   -0.5946   -1.5568    0.0000 C   0  0  0  0  0  0  0  0  0  0  0  0
    0.9714   -1.4986    0.0000 C   0  0  0  0  0  0  0  0  0  0  0  0
    1.4083   -0.8349    0.0000 C   0  0  0  0  0  0  0  0  0  0  0  0
    1.3999    0.0135    0.0000 C   0  0  0  0  0  0  0  0  0  0  0  0
    0.8988    0.6695    0.0000 C   0  0  0  0  0  0  0  0  0  0  0  0
    0.1059    0.8972    0.0000 C   0  0  0  0  0  0  0  0  0  0  0  0
   -0.6661    0.6053    0.0000 C   0  0  0  0  0  0  0  0  0  0  0  0
   -1.1273   -0.0791    0.0000 C   0  0  0  0  0  0  0  0  0  0  0  0
   -1.1339   -0.9041    0.0000 C   0  0  0  0  0  0  0  0  0  0  0  0
   -1.8384    0.3391    0.0000 C   0  0  0  0  0  0  0  0  0  0  0  0
   -2.5562   -0.0791    0.0000 C   0  0  0  0  0  0  0  0  0  0  0  0
   -2.5562   -0.9041    0.0000 C   0  0  0  0  0  0  0  0  0  0  0  0
   -1.8384   -1.3223    0.0000 C   0  0  0  0  0  0  0  0  0  0  0  0
    0.1914   -2.6293    0.0000 C   0  0  0  0  0  0  0  0  0  0  0  0
    1.0248   -2.8312    0.0000 C   0  0  0  0  0  0  0  0  0  0  0  0
    1.4822   -2.1455    0.0000 O   0  0  0  0  0  0  0  0  0  0  0  0
   -1.8384   -2.1473    0.0000 C   0  0  0  0  0  0  0  0  0  0  0  0
   -0.4831   -3.0205    0.0000 C   0  0  0  0  0  0  0  0  0  0  0  0
    1.4373   -3.5456    0.0000 O   0  0  0  0  0  0  0  0  0  0  0  0
    2.1968    0.2270    0.0000 C   0  0  0  0  0  0  0  0  0  0  0  0
    2.4103    1.0239    0.0000 O   0  0  0  0  0  0  0  0  0  0  0  0
    0.1984   -0.9595    0.0000 O   0  0  0  0  0  0  0  0  0  0  0  0
   -1.3408    0.7178    0.0000 C   0  0  0  0  0  0  0  0  0  0  0  0
   -0.8796    1.4022    0.0000 O   0  0  0  0  0  0  0  0  0  0  0  0
   -0.4671    2.1167    0.0000 C   0  0  0  0  0  0  0  0  0  0  0  0
   -0.8796    2.8312    0.0000 C   0  0  0  0  0  0  0  0  0  0  0  0
   -1.2921    3.5456    0.0000 C   0  0  0  0  0  0  0  0  0  0  0  0
   -1.7046    2.8312    0.0000 C   0  0  0  0  0  0  0  0  0  0  0  0
   -0.4671    3.5456    0.0000 C   0  0  0  0  0  0  0  0  0  0  0  0
    0.3298    1.9032    0.0000 O   0  0  0  0  0  0  0  0  0  0  0  0
   -1.0999   -2.0613    0.0000 O   0  0  0  0  0  0  0  0  0  0  0  0
   -2.4801   -1.6914    0.0000 O   0  0  0  0  0  0  0  0  0  0  0  0
   -1.6833   -1.4779    0.0000 C   0  0  0  0  0  0  0  0  0  0  0  0
   -1.4697   -0.6810    0.0000 C   0  0  0  0  0  0  0  0  0  0  0  0
    2.9112    0.2279    0.0000 O   0  0  0  0  0  0  0  0  0  0  0  0
    3.6256   -0.1846    0.0000 C   0  0  0  0  0  0  0  0  0  0  0  0
   -2.1967    0.5456    0.0000 O   0  0  0  0  0  0  0  0  0  0  0  0
   -2.9112    1.7831    0.0000 O   0  0  0  0  0  0  0  0  0  0  0  0
   -2.9112    0.9581    0.0000 C   0  0  0  0  0  0  0  0  0  0  0  0
   -3.6256    0.5456    0.0000 C   0  0  0  0  0  0  0  0  0  0  0  0
  1  2  1  0      
  1  3  1  0      
  3  4  1  0      
  4  5  2  0      
  5  6  1  0      
  6  7  1  0      
  7  8  1  0      
  8  9  1  0      
  9 10  1  0      
  2 10  1  0      
  9 11  1  0      
 11 12  1  0      
 12 13  1  0      
 13 14  1  0      
 14 10  1  0      
  1 15  1  0      
 15 16  1  0      
 16 17  1  0      
 14 18  2  0      
 15 19  1  6      
  3 17  1  6      
 16 20  2  0      
  5 21  1  0      
 21 22  2  0      
  1 23  1  6      
  9 24  1  1      
  8 25  1  1      
 25 26  1  0      
 26 27  1  0      
 27 28  1  0      
 27 29  1  0      
 27 30  1  0      
 26 31  2  0      
  2 32  1  1      
 32 34  1  0      
 33 34  2  0      
 34 35  1  0      
 21 36  1  0      
 36 37  1  0      
 11 38  1  6      
 38 40  1  0      
 39 40  2  0      
 40 41  1  0      
M  STY  1   1 SUP
M  SLB  1   1   1
M  SAL   1  4  32  33  34  35
M  SBL   1  1  34
M  SMT   1 OAc
M  SBV   1 34   -8.4814    4.1262
M  STY  1   2 SUP
M  SLB  1   2   2
M  SAL   2  2  36  37
M  SBL   2  1  38
M  SMT   2 OMe
M  SBV   2 38   -7.2617    4.6316
M  STY  1   3 SUP
M  SLB  1   3   3
M  SAL   3  4  38  39  40  41
M  SBL   3  1  40
M  SMT   3 OAc
M  SBV   3 40   -8.3344    4.8371
M  END
