# Supplementary material for: Four New Briarane Diterpenoids from Taiwanese Gorgonian Junceella fragilis
Source: MDPI journal article supplement (doi:10.3390/md11062042), 2013-06-10
Supplement: s4 [file s4]

marinedrugs-11-02042-s002.mol
  corina  04141423023D 1   1.00000     0.00000 
CORINA 3.49 0023  12.04.2013
 38 40  0  0  0  0  0  0  0  0999 V2000
    0.1399    1.6441   -0.0125 C   0  0  0  0  0  0  0  0  0  0  0  0
    0.0204    0.1248   -0.0199 C   0  0  0  0  0  0  0  0  0  0  0  0
    1.5956    2.1263   -0.0011 C   0  0  0  0  0  0  0  0  0  0  0  0
    1.8084    3.0600    1.1601 C   0  0  0  0  0  0  0  0  0  0  0  0
    2.6646    2.8407    2.1455 C   0  0  0  0  0  0  0  0  0  0  0  0
    3.5546    1.6423    2.2518 C   0  0  0  0  0  0  0  0  0  0  0  0
    2.8123    0.3180    2.1352 C   0  0  0  0  0  0  0  0  0  0  0  0
    1.3935    0.4183    2.6788 C   0  0  0  0  0  0  0  0  0  0  0  0
    0.5579   -0.8089    2.3241 C   0  0  0  0  0  0  0  0  0  0  0  0
   -0.4874   -0.4831    1.2581 C   0  0  0  0  0  0  0  0  0  0  0  0
   -0.1954   -1.2712    3.5865 C   0  0  0  0  0  0  0  0  0  0  0  0
   -0.9823   -2.5515    3.3274 C   0  0  0  0  0  0  0  0  0  0  0  0
   -1.9744   -2.3843    2.1796 C   0  0  0  0  0  0  0  0  0  0  0  0
   -1.2739   -1.7575    0.9935 C   0  0  0  0  0  0  0  0  0  0  0  0
   -0.4205    2.2113   -1.3395 C   0  0  0  0  0  0  0  0  0  0  0  0
    0.7355    2.9101   -2.0044 C   0  0  0  0  0  0  0  0  0  0  0  0
    1.8221    2.8538   -1.2394 O   0  0  0  0  0  0  0  0  0  0  0  0
   -1.3553   -2.3123   -0.1844 C   0  0  0  0  0  0  0  0  0  0  0  0
   -1.5430    3.2089   -1.0451 C   0  0  0  0  0  0  0  0  0  0  0  0
    0.6829    3.4479   -3.0853 O   0  0  0  0  0  0  0  0  0  0  0  0
    2.7480    3.8688    3.2118 C   0  0  0  0  0  0  0  0  0  0  0  0
    2.0472    4.8602    3.1561 O   0  0  0  0  0  0  0  0  0  0  0  0
   -0.5844    2.2424    1.0676 O   0  0  0  0  0  0  0  0  0  0  0  0
    1.4528   -1.9659    1.8761 C   0  0  0  0  0  0  0  0  0  0  0  0
    1.4616    0.5582    4.1301 O   0  0  0  0  0  0  0  0  0  0  0  0
    0.3289    2.4477    3.9565 O   0  0  0  0  0  0  0  0  0  0  0  0
    0.9250    1.6680    4.6613 C   0  0  0  0  0  0  0  0  0  0  0  0
    1.0659    1.9414    6.1365 C   0  0  0  0  0  0  0  0  0  0  0  0
   -1.1028   -0.2216    4.0156 O   0  0  0  0  0  0  0  0  0  0  0  0
   -0.8479   -0.9194    6.0969 O   0  0  0  0  0  0  0  0  0  0  0  0
   -1.3620   -0.1399    5.3301 C   0  0  0  0  0  0  0  0  0  0  0  0
   -2.2943    0.9241    5.8495 C   0  0  0  0  0  0  0  0  0  0  0  0
    3.6009    3.7033    4.2424 O   0  0  0  0  0  0  0  0  0  0  0  0
    3.6293    4.7494    5.2490 C   0  0  0  0  0  0  0  0  0  0  0  0
    1.2465   -0.4764   -0.4875 O   0  0  0  0  0  0  0  0  0  0  0  0
    0.4482   -0.3865   -2.5461 O   0  0  0  0  0  0  0  0  0  0  0  0
    1.3544   -0.6925   -1.8079 C   0  0  0  0  0  0  0  0  0  0  0  0
    2.6057   -1.3168   -2.3695 C   0  0  0  0  0  0  0  0  0  0  0  0
  1  2  1  0      
  1  3  1  0      
  3  4  1  0      
  4  5  2  0      
  5  6  1  0      
  6  7  1  0      
  7  8  1  0      
  8  9  1  0      
  9 10  1  0      
  2 10  1  0      
  9 11  1  0      
 11 12  1  0      
 12 13  1  0      
 13 14  1  0      
 14 10  1  0      
  1 15  1  0      
 15 16  1  0      
 16 17  1  0      
 14 18  2  0      
 15 19  1  0      
  3 17  1  0      
 16 20  2  0      
  5 21  1  0      
 21 22  2  0      
  1 23  1  0      
  9 24  1  0      
  8 25  1  0      
 25 27  1  0      
 26 27  2  0      
 27 28  1  0      
 11 29  1  0      
 29 31  1  0      
 30 31  2  0      
 31 32  1  0      
 21 33  1  0      
 33 34  1  0      
  2 35  1  0      
 35 37  1  0      
 36 37  2  0      
 37 38  1  0      
M  STY  1   1 SUP
M  SLB  1   1   1
M  SAL   1  4  25  26  27  28
M  SBL   1  1  27
M  SMT   1 OAc
M  SBV   1 27   -8.3347    5.8764
M  STY  1   2 SUP
M  SLB  1   2   2
M  SAL   2  4  29  30  31  32
M  SBL   2  1  31
M  SMT   2 OAc
M  SBV   2 31   -8.3339    5.8758
M  STY  1   3 SUP
M  SLB  1   3   3
M  SAL   3  2  33  34
M  SBL   3  1  35
M  SMT   3 OMe
M  SBV   3 35   -6.9301    6.1045
M  STY  1   4 SUP
M  SLB  1   4   4
M  SAL   4  4  35  36  37  38
M  SBL   4  1  37
M  SMT   4 OAc
M  SBV   4 37   -8.2320    5.2968
M  END
$$$$
