# Supplementary material for: Four New Briarane Diterpenoids from Taiwanese Gorgonian Junceella fragilis
Source: MDPI journal article supplement (doi:10.3390/md11062042), 2013-06-10
Supplement: s5 [file s5]

marinedrugs-11-02042-s002.mol
  ChemDraw04151410582D

 38 40  0  0  0  0  0  0  0  0999 V2000
    0.3403   -1.0973    0.0000 C   0  0  0  0  0  0  0  0  0  0  0  0
   -0.4527   -0.8696    0.0000 C   0  0  0  0  0  0  0  0  0  0  0  0
    1.1133   -0.8114    0.0000 C   0  0  0  0  0  0  0  0  0  0  0  0
    1.4471   -0.1477    0.0000 C   0  0  0  0  0  0  0  0  0  0  0  0
    1.4519    0.7202    0.0000 C   0  0  0  0  0  0  0  0  0  0  0  0
    1.0407    1.3567    0.0000 C   0  0  0  0  0  0  0  0  0  0  0  0
    0.2478    1.5844    0.0000 C   0  0  0  0  0  0  0  0  0  0  0  0
   -0.5242    1.2925    0.0000 C   0  0  0  0  0  0  0  0  0  0  0  0
   -0.9854    0.6081    0.0000 C   0  0  0  0  0  0  0  0  0  0  0  0
   -0.9920   -0.2168    0.0000 C   0  0  0  0  0  0  0  0  0  0  0  0
   -1.6965    1.0263    0.0000 C   0  0  0  0  0  0  0  0  0  0  0  0
   -2.4143    0.6081    0.0000 C   0  0  0  0  0  0  0  0  0  0  0  0
   -2.4143   -0.2168    0.0000 C   0  0  0  0  0  0  0  0  0  0  0  0
   -1.6965   -0.6350    0.0000 C   0  0  0  0  0  0  0  0  0  0  0  0
    0.3333   -1.9421    0.0000 C   0  0  0  0  0  0  0  0  0  0  0  0
    1.1667   -2.1439    0.0000 C   0  0  0  0  0  0  0  0  0  0  0  0
    1.6241   -1.4583    0.0000 O   0  0  0  0  0  0  0  0  0  0  0  0
   -1.6965   -1.4600    0.0000 C   0  0  0  0  0  0  0  0  0  0  0  0
   -0.3412   -2.3333    0.0000 C   0  0  0  0  0  0  0  0  0  0  0  0
    1.5792   -2.8584    0.0000 O   0  0  0  0  0  0  0  0  0  0  0  0
    2.3387    0.9142    0.0000 C   0  0  0  0  0  0  0  0  0  0  0  0
    1.9262    1.6287    0.0000 O   0  0  0  0  0  0  0  0  0  0  0  0
    0.3403   -0.2723    0.0000 O   0  0  0  0  0  0  0  0  0  0  0  0
   -1.3979    1.3226    0.0000 C   0  0  0  0  0  0  0  0  0  0  0  0
   -1.2151    1.4781    0.0000 O   0  0  0  0  0  0  0  0  0  0  0  0
   -2.5954    1.8480    0.0000 O   0  0  0  0  0  0  0  0  0  0  0  0
   -1.7985    2.0615    0.0000 C   0  0  0  0  0  0  0  0  0  0  0  0
   -1.5850    2.8584    0.0000 C   0  0  0  0  0  0  0  0  0  0  0  0
   -2.3866    1.2114    0.0000 O   0  0  0  0  0  0  0  0  0  0  0  0
   -3.7669    1.5812    0.0000 O   0  0  0  0  0  0  0  0  0  0  0  0
   -2.9700    1.7947    0.0000 C   0  0  0  0  0  0  0  0  0  0  0  0
   -2.7565    2.5916    0.0000 C   0  0  0  0  0  0  0  0  0  0  0  0
    3.0524    1.3279    0.0000 O   0  0  0  0  0  0  0  0  0  0  0  0
    3.7669    0.9154    0.0000 C   0  0  0  0  0  0  0  0  0  0  0  0
   -1.0410   -1.2636    0.0000 O   0  0  0  0  0  0  0  0  0  0  0  0
   -1.7555   -0.0284    0.0000 O   0  0  0  0  0  0  0  0  0  0  0  0
   -1.7555   -0.8511    0.0000 C   0  0  0  0  0  0  0  0  0  0  0  0
   -2.4720   -1.2648    0.0000 C   0  0  0  0  0  0  0  0  0  0  0  0
  1  2  1  0      
  1  3  1  0      
  3  4  1  0      
  4  5  2  0      
  5  6  1  0      
  6  7  1  0      
  7  8  1  0      
  8  9  1  0      
  9 10  1  0      
  2 10  1  0      
  9 11  1  0      
 11 12  1  0      
 12 13  1  0      
 13 14  1  0      
 14 10  1  0      
  1 15  1  0      
 15 16  1  0      
 16 17  1  0      
 14 18  2  0      
 15 19  1  6      
  3 17  1  6      
 16 20  2  0      
  5 21  1  0      
 21 22  2  0      
  1 23  1  6      
  9 24  1  1      
  8 25  1  1      
 25 27  1  0      
 26 27  2  0      
 27 28  1  0      
 11 29  1  6      
 29 31  1  0      
 30 31  2  0      
 31 32  1  0      
 21 33  1  0      
 33 34  1  0      
  2 35  1  1      
 35 37  1  0      
 36 37  2  0      
 37 38  1  0      
M  STY  1   1 SUP
M  SLB  1   1   1
M  SAL   1  4  25  26  27  28
M  SBL   1  1  27
M  SMT   1 OAc
M  SBV   1 27   -8.3347    5.8764
M  STY  1   2 SUP
M  SLB  1   2   2
M  SAL   2  4  29  30  31  32
M  SBL   2  1  31
M  SMT   2 OAc
M  SBV   2 31   -8.3339    5.8758
M  STY  1   3 SUP
M  SLB  1   3   3
M  SAL   3  2  33  34
M  SBL   3  1  35
M  SMT   3 OMe
M  SBV   3 35   -6.9301    6.1045
M  STY  1   4 SUP
M  SLB  1   4   4
M  SAL   4  4  35  36  37  38
M  SBL   4  1  37
M  SMT   4 OAc
M  SBV   4 37   -8.2320    5.2968
M  END
