# Supplementary material for: Four New Briarane Diterpenoids from Taiwanese Gorgonian Junceella fragilis
Source: MDPI journal article supplement (doi:10.3390/md11062042), 2013-06-10
Supplement: s6 [file s6]

  corina  04231401533D 1   1.00000     0.00000 
CORINA 3.49 0023  12.04.2013
 72 76  0  0  0  0  0  0  0  0999 V2000
    0.4674    2.3106   -0.5777 C   0  0  0  0  0  0  0  0  0  0  0  0
    0.8946    1.0916    0.2568 C   0  0  0  0  0  0  0  0  0  0  0  0
    2.2514    0.6184   -0.2828 C   0  0  0  0  0  0  0  0  0  0  0  0
    1.7425    2.9414   -1.1294 C   0  0  0  0  0  0  0  0  0  0  0  0
    2.9598   -1.5520   -2.8229 C   0  0  0  0  0  0  0  0  0  0  0  0
    3.5100   -0.2154   -2.2911 C   0  0  0  0  0  0  0  0  0  0  0  0
    2.6739   -1.4587   -4.3281 C   0  0  0  0  0  0  0  0  0  0  0  0
    1.2110   -1.3457   -4.6348 C   0  0  0  0  0  0  0  0  0  0  0  0
    0.7444   -0.2953   -5.2721 C   0  0  0  0  0  0  0  0  0  0  0  0
    1.6505    0.8137   -5.7274 C   0  0  0  0  0  0  0  0  0  0  0  0
    1.9521    2.0226   -4.8521 C   0  0  0  0  0  0  0  0  0  0  0  0
    1.3404    2.1408   -3.4685 C   0  0  0  0  0  0  0  0  0  0  0  0
    2.3028    2.0968   -2.2935 C   0  0  0  0  0  0  0  0  0  0  0  0
    2.3808    0.6537   -1.8077 C   0  0  0  0  0  0  0  0  0  0  0  0
    4.0592   -2.6410   -2.7425 C   0  0  0  0  0  0  0  0  0  0  0  0
    4.0595   -3.2883   -4.1061 C   0  0  0  0  0  0  0  0  0  0  0  0
    3.2301   -2.6575   -4.9395 O   0  0  0  0  0  0  0  0  0  0  0  0
    3.4105    0.9035    0.4961 O   0  0  0  0  0  0  0  0  0  0  0  0
    2.9751   -0.4570    0.5162 C   0  0  0  0  0  0  0  0  0  0  0  0
   -0.7354   -0.2055   -5.5661 C   0  0  0  0  0  0  0  0  0  0  0  0
    0.1006   -2.5962   -4.1697 Cl  0  0  0  0  0  0  0  0  0  0  0  0
    4.7360   -4.2410   -4.4090 O   0  0  0  0  0  0  0  0  0  0  0  0
    3.6939   -3.6766   -1.6751 C   0  0  0  0  0  0  0  0  0  0  0  0
    1.8248   -1.9736   -2.0750 O   0  0  0  0  0  0  0  0  0  0  0  0
    4.3480    0.3373   -3.3286 O   0  0  0  0  0  0  0  0  0  0  0  0
    3.6655    2.7107   -2.5845 C   0  0  0  0  0  0  0  0  0  0  0  0
    1.5297    4.3146   -1.5189 O   0  0  0  0  0  0  0  0  0  0  0  0
    0.5290    3.3393   -3.4375 O   0  0  0  0  0  0  0  0  0  0  0  0
   -0.8004    3.1777   -3.5282 C   0  0  0  0  0  0  0  0  0  0  0  0
   -1.7008    4.3821   -3.6286 C   0  0  0  0  0  0  0  0  0  0  0  0
    5.6693    0.3659   -3.0939 C   0  0  0  0  0  0  0  0  0  0  0  0
    6.6014    0.9792   -4.1069 C   0  0  0  0  0  0  0  0  0  0  0  0
    6.1114   -0.1000   -2.0705 O   0  0  0  0  0  0  0  0  0  0  0  0
   -0.9350   -0.0940   -6.9767 O   0  0  0  0  0  0  0  0  0  0  0  0
   -1.2753    2.0667   -3.5293 O   0  0  0  0  0  0  0  0  0  0  0  0
    1.7387    5.2531   -0.5823 C   0  0  0  0  0  0  0  0  0  0  0  0
    1.5364    6.7087   -0.9159 C   0  0  0  0  0  0  0  0  0  0  0  0
    2.0890    4.9309    0.5282 O   0  0  0  0  0  0  0  0  0  0  0  0
    1.0331    2.0807   -5.9626 O   0  0  0  0  0  0  0  0  0  0  0  0
    1.4262    0.1898   -2.1723 H   0  0  0  0  0  0  0  0  0  0  0  0
   -0.1822    1.9924   -1.3927 H   0  0  0  0  0  0  0  0  0  0  0  0
   -0.0533    3.0274    0.0554 H   0  0  0  0  0  0  0  0  0  0  0  0
    0.9939    1.3805    1.2998 H   0  0  0  0  0  0  0  0  0  0  0  0
    0.1630    0.2902    0.1528 H   0  0  0  0  0  0  0  0  0  0  0  0
    2.4998    2.9362   -0.3288 H   0  0  0  0  0  0  0  0  0  0  0  0
    4.1693   -0.4615   -1.4391 H   0  0  0  0  0  0  0  0  0  0  0  0
    3.1901   -0.5996   -4.7685 H   0  0  0  0  0  0  0  0  0  0  0  0
    2.4296    0.5113   -6.4419 H   0  0  0  0  0  0  0  0  0  0  0  0
    2.8483    2.6197   -5.0612 H   0  0  0  0  0  0  0  0  0  0  0  0
    0.6514    1.2890   -3.3498 H   0  0  0  0  0  0  0  0  0  0  0  0
    5.0263   -2.1899   -2.5302 H   0  0  0  0  0  0  0  0  0  0  0  0
    2.4890   -0.8076    1.4347 H   0  0  0  0  0  0  0  0  0  0  0  0
    3.5709   -1.2007    0.0017 H   0  0  0  0  0  0  0  0  0  0  0  0
   -1.2340   -1.1023   -5.1983 H   0  0  0  0  0  0  0  0  0  0  0  0
   -1.1519    0.6711   -5.0698 H   0  0  0  0  0  0  0  0  0  0  0  0
    2.7439   -4.1447   -1.9331 H   0  0  0  0  0  0  0  0  0  0  0  0
    4.4725   -4.4378   -1.6259 H   0  0  0  0  0  0  0  0  0  0  0  0
    3.6053   -3.1844   -0.7066 H   0  0  0  0  0  0  0  0  0  0  0  0
    1.4451   -2.8108   -2.3748 H   0  0  0  0  0  0  0  0  0  0  0  0
    4.3353    2.5228   -1.7453 H   0  0  0  0  0  0  0  0  0  0  0  0
    4.0803    2.2630   -3.4876 H   0  0  0  0  0  0  0  0  0  0  0  0
    3.5565    3.7856   -2.7288 H   0  0  0  0  0  0  0  0  0  0  0  0
   -1.0970    5.2894   -3.6122 H   0  0  0  0  0  0  0  0  0  0  0  0
   -2.2645    4.3376   -4.5604 H   0  0  0  0  0  0  0  0  0  0  0  0
   -2.3919    4.3903   -2.7858 H   0  0  0  0  0  0  0  0  0  0  0  0
    6.0250    1.3431   -4.9575 H   0  0  0  0  0  0  0  0  0  0  0  0
    7.1388    1.8101   -3.6499 H   0  0  0  0  0  0  0  0  0  0  0  0
    7.3145    0.2278   -4.4461 H   0  0  0  0  0  0  0  0  0  0  0  0
   -1.8637   -0.0320   -7.2388 H   0  0  0  0  0  0  0  0  0  0  0  0
    1.2232    6.8031   -1.9557 H   0  0  0  0  0  0  0  0  0  0  0  0
    0.7682    7.1272   -0.2656 H   0  0  0  0  0  0  0  0  0  0  0  0
    2.4715    7.2488   -0.7677 H   0  0  0  0  0  0  0  0  0  0  0  0
  1  2  1  0      
  4  1  1  0      
  1 41  1  0      
  1 42  1  0      
  2  3  1  0      
  2 43  1  0      
  2 44  1  0      
  3 14  1  0      
  3 18  1  0      
 19  3  1  0      
 13  4  1  0      
  4 27  1  0      
  4 45  1  0      
  5  6  1  0      
  5  7  1  0      
  5 15  1  0      
  5 24  1  0      
  6 14  1  0      
  6 25  1  0      
  6 46  1  0      
  7  8  1  0      
  7 17  1  0      
  7 47  1  0      
  8  9  2  0      
  8 21  1  0      
  9 10  1  0      
  9 20  1  0      
 10 11  1  0      
 10 39  1  0      
 10 48  1  0      
 11 12  1  0      
 11 39  1  0      
 11 49  1  0      
 12 13  1  0      
 12 28  1  0      
 12 50  1  0      
 13 14  1  0      
 13 26  1  0      
 14 40  1  0      
 15 16  1  0      
 15 23  1  0      
 15 51  1  0      
 16 17  1  0      
 16 22  2  0      
 18 19  1  0      
 19 52  1  0      
 19 53  1  0      
 20 34  1  0      
 20 54  1  0      
 20 55  1  0      
 23 56  1  0      
 23 57  1  0      
 23 58  1  0      
 24 59  1  0      
 25 31  1  0      
 26 60  1  0      
 26 61  1  0      
 26 62  1  0      
 27 36  1  0      
 28 29  1  0      
 29 30  1  0      
 29 35  2  0      
 30 63  1  0      
 30 64  1  0      
 30 65  1  0      
 31 32  1  0      
 31 33  2  0      
 32 66  1  0      
 32 67  1  0      
 32 68  1  0      
 34 69  1  0      
 36 37  1  0      
 36 38  2  0      
 37 70  1  0      
 37 71  1  0      
 37 72  1  0      
M  END
$$$$
