# Supplementary material for: Four New Briarane Diterpenoids from Taiwanese Gorgonian Junceella fragilis
Source: MDPI journal article supplement (doi:10.3390/md11062042), 2013-06-10
Supplement: s7 [file s7]

  Chem3D Core 13.0.004221420103D

 72 76  0  0  0  0  0  0  0  0999 V2000
   -0.7501    0.4439   -2.9286 C   0  0  0  0  0  0  0  0  0  0  0  0
   -0.3657   -1.0268   -3.1303 C   0  0  0  0  0  0  0  0  0  0  0  0
   -0.4865   -1.7968   -1.8241 C   0  0  0  0  0  0  0  0  0  0  0  0
   -1.7436    0.5403   -1.7657 C   0  0  0  0  0  0  0  0  0  0  0  0
    1.7361   -2.3874    0.5617 C   0  0  0  0  0  0  0  0  0  0  0  0
    0.2715   -1.9047    0.6604 C   0  0  0  0  0  0  0  0  0  0  0  0
    2.8142   -1.3888    0.9869 C   0  0  0  0  0  0  0  0  0  0  0  0
    3.0864   -0.2400    0.0346 C   0  0  0  0  0  0  0  0  0  0  0  0
    2.6855    1.0326    0.2569 C   0  0  0  0  0  0  0  0  0  0  0  0
    1.9902    1.3716    1.4953 C   0  0  0  0  0  0  0  0  0  0  0  0
    0.5870    1.4105    1.4030 C   0  0  0  0  0  0  0  0  0  0  0  0
   -0.2353    1.5073    0.1009 C   0  0  0  0  0  0  0  0  0  0  0  0
   -1.0701    0.2600   -0.3660 C   0  0  0  0  0  0  0  0  0  0  0  0
   -0.1373   -1.0065   -0.5450 C   0  0  0  0  0  0  0  0  0  0  0  0
    2.0964   -3.5602    1.4841 C   0  0  0  0  0  0  0  0  0  0  0  0
    3.6097   -3.4449    1.5766 C   0  0  0  0  0  0  0  0  0  0  0  0
    3.9594   -2.1783    1.2234 O   0  0  0  0  0  0  0  0  0  0  0  0
   -1.8684   -2.5869   -1.6435 O   0  0  0  0  0  0  0  0  0  0  0  0
   -0.6476   -3.2222   -1.9261 C   0  0  0  0  0  0  0  0  0  0  0  0
    3.1101    2.1631   -0.6622 C   0  0  0  0  0  0  0  0  0  0  0  0
    4.0124   -0.6071   -1.3773 Cl  0  0  0  0  0  0  0  0  0  0  0  0
    4.3845   -4.3237    1.8855 O   0  0  0  0  0  0  0  0  0  0  0  0
    1.6288   -4.9473    1.0270 C   0  0  0  0  0  0  0  0  0  0  0  0
    2.0246   -2.7773   -0.7560 O   0  0  0  0  0  0  0  0  0  0  0  0
    0.1118   -1.2723    1.8909 O   0  0  0  0  0  0  0  0  0  0  0  0
   -2.2496    0.0003    0.6011 C   0  0  0  0  0  0  0  0  0  0  0  0
   -2.3821    1.7810   -1.8014 O   0  0  0  0  0  0  0  0  0  0  0  0
   -1.0835    2.6292    0.2917 O   0  0  0  0  0  0  0  0  0  0  0  0
   -0.8994    3.7653   -0.4477 C   0  0  0  0  0  0  0  0  0  0  0  0
   -1.8831    4.8266    0.0042 C   0  0  0  0  0  0  0  0  0  0  0  0
   -0.6331   -1.7260    2.9452 C   0  0  0  0  0  0  0  0  0  0  0  0
   -1.4562   -2.9850    2.7345 C   0  0  0  0  0  0  0  0  0  0  0  0
   -0.6432   -1.1327    4.0040 O   0  0  0  0  0  0  0  0  0  0  0  0
    4.5143    2.3525   -0.5444 O   0  0  0  0  0  0  0  0  0  0  0  0
   -0.0862    3.9168   -1.3320 O   0  0  0  0  0  0  0  0  0  0  0  0
   -3.4905    2.0723   -2.5426 C   0  0  0  0  0  0  0  0  0  0  0  0
   -4.1232    0.9280   -3.3177 C   0  0  0  0  0  0  0  0  0  0  0  0
   -3.9637    3.1898   -2.5604 O   0  0  0  0  0  0  0  0  0  0  0  0
    1.3281    2.7600    1.5198 O   0  0  0  0  0  0  0  0  0  0  0  0
    0.8239   -0.5363   -0.8611 H   0  0  0  0  0  0  0  0  0  0  0  0
   -1.1752    0.8488   -3.8757 H   0  0  0  0  0  0  0  0  0  0  0  0
    0.1519    1.0638   -2.7270 H   0  0  0  0  0  0  0  0  0  0  0  0
   -1.0032   -1.4881   -3.9204 H   0  0  0  0  0  0  0  0  0  0  0  0
    0.6921   -1.0867   -3.4810 H   0  0  0  0  0  0  0  0  0  0  0  0
   -2.5226   -0.2405   -1.9061 H   0  0  0  0  0  0  0  0  0  0  0  0
   -0.3847   -2.7922    0.6397 H   0  0  0  0  0  0  0  0  0  0  0  0
    2.5627   -0.9773    1.9907 H   0  0  0  0  0  0  0  0  0  0  0  0
    2.5169    1.2281    2.4428 H   0  0  0  0  0  0  0  0  0  0  0  0
    0.0056    1.2495    2.3181 H   0  0  0  0  0  0  0  0  0  0  0  0
    0.4748    1.7121   -0.7240 H   0  0  0  0  0  0  0  0  0  0  0  0
    1.7137   -3.3679    2.5156 H   0  0  0  0  0  0  0  0  0  0  0  0
   -0.3943   -3.9059   -1.1232 H   0  0  0  0  0  0  0  0  0  0  0  0
   -0.6848   -3.6715   -2.9176 H   0  0  0  0  0  0  0  0  0  0  0  0
    2.8862    1.9267   -1.7254 H   0  0  0  0  0  0  0  0  0  0  0  0
    2.6347    3.1418   -0.4486 H   0  0  0  0  0  0  0  0  0  0  0  0
    1.8805   -5.7214    1.7874 H   0  0  0  0  0  0  0  0  0  0  0  0
    0.5268   -4.9792    0.8805 H   0  0  0  0  0  0  0  0  0  0  0  0
    2.1098   -5.2554    0.0718 H   0  0  0  0  0  0  0  0  0  0  0  0
    2.9677   -2.7487   -0.9368 H   0  0  0  0  0  0  0  0  0  0  0  0
   -2.6993   -1.0026    0.4311 H   0  0  0  0  0  0  0  0  0  0  0  0
   -1.9727    0.0774    1.6708 H   0  0  0  0  0  0  0  0  0  0  0  0
   -3.0674    0.7440    0.4795 H   0  0  0  0  0  0  0  0  0  0  0  0
   -1.6498    5.1460    1.0451 H   0  0  0  0  0  0  0  0  0  0  0  0
   -1.8288    5.7214   -0.6558 H   0  0  0  0  0  0  0  0  0  0  0  0
   -2.9252    4.4358   -0.0316 H   0  0  0  0  0  0  0  0  0  0  0  0
   -2.1861   -2.8702    1.9029 H   0  0  0  0  0  0  0  0  0  0  0  0
   -0.8069   -3.8735    2.5748 H   0  0  0  0  0  0  0  0  0  0  0  0
   -2.0592   -3.2011    3.6453 H   0  0  0  0  0  0  0  0  0  0  0  0
    4.9475    1.5413   -0.8197 H   0  0  0  0  0  0  0  0  0  0  0  0
   -3.4079    0.4259   -4.0040 H   0  0  0  0  0  0  0  0  0  0  0  0
   -4.5842    0.1876   -2.6258 H   0  0  0  0  0  0  0  0  0  0  0  0
   -4.9475    1.3141   -3.9593 H   0  0  0  0  0  0  0  0  0  0  0  0
  1  2  1  0      
  4  1  1  0      
  1 41  1  0      
  1 42  1  0      
  2  3  1  0      
  2 43  1  0      
  2 44  1  0      
  3 14  1  0      
  3 18  1  0      
 19  3  1  0      
 13  4  1  0      
  4 27  1  0      
  4 45  1  0      
  5  6  1  0      
  5  7  1  0      
  5 15  1  0      
  5 24  1  0      
  6 14  1  0      
  6 25  1  0      
  6 46  1  0      
  7  8  1  0      
  7 17  1  0      
  7 47  1  0      
  8  9  2  0      
  8 21  1  0      
  9 10  1  0      
  9 20  1  0      
 10 11  1  0      
 10 39  1  0      
 10 48  1  0      
 11 12  1  0      
 11 39  1  0      
 11 49  1  0      
 12 13  1  0      
 12 28  1  0      
 12 50  1  0      
 13 14  1  0      
 13 26  1  0      
 14 40  1  0      
 15 16  1  0      
 15 23  1  0      
 15 51  1  0      
 16 17  1  0      
 16 22  2  0      
 18 19  1  0      
 19 52  1  0      
 19 53  1  0      
 20 34  1  0      
 20 54  1  0      
 20 55  1  0      
 23 56  1  0      
 23 57  1  0      
 23 58  1  0      
 24 59  1  0      
 25 31  1  0      
 26 60  1  0      
 26 61  1  0      
 26 62  1  0      
 27 36  1  0      
 28 29  1  0      
 29 30  1  0      
 29 35  2  0      
 30 63  1  0      
 30 64  1  0      
 30 65  1  0      
 31 32  1  0      
 31 33  2  0      
 32 66  1  0      
 32 67  1  0      
 32 68  1  0      
 34 69  1  0      
 36 37  1  0      
 36 38  2  0      
 37 70  1  0      
 37 71  1  0      
 37 72  1  0      
M  END
