# Supplementary material for: Four New Briarane Diterpenoids from Taiwanese Gorgonian Junceella fragilis
Source: MDPI journal article supplement (doi:10.3390/md11062042), 2013-06-10
Supplement: s9 [file s9]

marinedrugs-11-02042-s004.mol
  ChemDraw01301415112D

 41 44  0  0  0  0  0  0  0  0999 V2000
    1.0926   -1.1510    0.0000 C   0  0  0  0  0  0  0  0  0  0  0  0
    0.2997   -0.9233    0.0000 C   0  0  0  0  0  0  0  0  0  0  0  0
    1.8657   -0.8651    0.0000 C   0  0  0  0  0  0  0  0  0  0  0  0
    2.3025   -0.2014    0.0000 C   0  0  0  0  0  0  0  0  0  0  0  0
    2.2942    0.6470    0.0000 C   0  0  0  0  0  0  0  0  0  0  0  0
    1.7930    1.3030    0.0000 C   0  0  0  0  0  0  0  0  0  0  0  0
    1.0001    1.5307    0.0000 C   0  0  0  0  0  0  0  0  0  0  0  0
    0.2282    1.2388    0.0000 C   0  0  0  0  0  0  0  0  0  0  0  0
   -0.2330    0.5544    0.0000 C   0  0  0  0  0  0  0  0  0  0  0  0
   -0.2396   -0.2705    0.0000 C   0  0  0  0  0  0  0  0  0  0  0  0
   -0.9442    0.9726    0.0000 C   0  0  0  0  0  0  0  0  0  0  0  0
   -1.6619    0.5544    0.0000 C   0  0  0  0  0  0  0  0  0  0  0  0
   -1.6619   -0.2705    0.0000 C   0  0  0  0  0  0  0  0  0  0  0  0
    1.0857   -1.9958    0.0000 C   0  0  0  0  0  0  0  0  0  0  0  0
    1.9190   -2.1976    0.0000 C   0  0  0  0  0  0  0  0  0  0  0  0
    2.3764   -1.5120    0.0000 O   0  0  0  0  0  0  0  0  0  0  0  0
    0.4111   -2.3870    0.0000 C   0  0  0  0  0  0  0  0  0  0  0  0
    2.3315   -2.9121    0.0000 O   0  0  0  0  0  0  0  0  0  0  0  0
    3.0911    0.8605    0.0000 C   0  0  0  0  0  0  0  0  0  0  0  0
    3.8055    0.4480    0.0000 Cl  0  0  0  0  0  0  0  0  0  0  0  0
    1.0926   -0.3260    0.0000 O   0  0  0  0  0  0  0  0  0  0  0  0
   -0.4466    1.3513    0.0000 C   0  0  0  0  0  0  0  0  0  0  0  0
   -1.6587   -1.1012    0.0000 O   0  0  0  0  0  0  0  0  0  0  0  0
   -0.9562   -0.6964    0.0000 C   0  0  0  0  0  0  0  0  0  0  0  0
   -1.2243   -1.5421    0.0000 C   0  0  0  0  0  0  0  0  0  0  0  0
   -0.2056   -1.4278    0.0000 O   0  0  0  0  0  0  0  0  0  0  0  0
   -1.5859   -1.0579    0.0000 O   0  0  0  0  0  0  0  0  0  0  0  0
   -0.7890   -0.8444    0.0000 C   0  0  0  0  0  0  0  0  0  0  0  0
   -0.5755   -0.0475    0.0000 C   0  0  0  0  0  0  0  0  0  0  0  0
   -0.2771    1.5319    0.0000 O   0  0  0  0  0  0  0  0  0  0  0  0
   -1.6574    1.9017    0.0000 O   0  0  0  0  0  0  0  0  0  0  0  0
   -0.8605    2.1152    0.0000 C   0  0  0  0  0  0  0  0  0  0  0  0
   -0.6470    2.9121    0.0000 C   0  0  0  0  0  0  0  0  0  0  0  0
   -1.3025    1.1791    0.0000 O   0  0  0  0  0  0  0  0  0  0  0  0
   -2.0169    2.4166    0.0000 O   0  0  0  0  0  0  0  0  0  0  0  0
   -2.0169    1.5916    0.0000 C   0  0  0  0  0  0  0  0  0  0  0  0
   -2.7314    1.1791    0.0000 C   0  0  0  0  0  0  0  0  0  0  0  0
   -2.3766    0.5548    0.0000 O   0  0  0  0  0  0  0  0  0  0  0  0
   -3.0911    1.7923    0.0000 O   0  0  0  0  0  0  0  0  0  0  0  0
   -3.0911    0.9673    0.0000 C   0  0  0  0  0  0  0  0  0  0  0  0
   -3.8055    0.5548    0.0000 C   0  0  0  0  0  0  0  0  0  0  0  0
  1  2  1  0      
  1  3  1  0      
  3  4  1  0      
  4  5  2  0      
  5  6  1  0      
  6  7  2  0      
  7  8  1  0      
  8  9  1  0      
  9 10  1  0      
  2 10  1  0      
  9 11  1  0      
 11 12  1  0      
 12 13  1  0      
  1 14  1  0      
 14 15  1  0      
 15 16  1  0      
 14 17  1  6      
  3 16  1  6      
 15 18  2  0      
  5 19  1  0      
 19 20  1  0      
  1 21  1  6      
  9 22  1  1      
 23 25  1  0      
 24 23  1  6      
 24 25  1  1      
 10 24  1  0      
 13 24  1  0      
  2 26  1  1      
 26 28  1  0      
 27 28  2  0      
 28 29  1  0      
  8 30  1  1      
 30 32  1  0      
 31 32  2  0      
 32 33  1  0      
 11 34  1  6      
 34 36  1  0      
 35 36  2  0      
 36 37  1  0      
 12 38  1  6      
 38 40  1  0      
 39 40  2  0      
 40 41  1  0      
M  STY  1   1 SUP
M  SLB  1   1   1
M  SAL   1  4  26  27  28  29
M  SBL   1  1  29
M  SMT   1 OAc
M  SBV   1 29   -5.8753    5.1516
M  STY  1   2 SUP
M  SLB  1   2   2
M  SAL   2  4  30  31  32  33
M  SBL   2  1  33
M  SMT   2 OAc
M  SBV   2 33   -5.8753    5.9491
M  STY  1   3 SUP
M  SLB  1   3   3
M  SAL   3  4  34  35  36  37
M  SBL   3  1  37
M  SMT   3 OAc
M  SBV   3 37   -5.7282    5.8625
M  STY  1   4 SUP
M  SLB  1   4   4
M  SAL   4  4  38  39  40  41
M  SBL   4  1  41
M  SMT   4 OAc
M  SBV   4 41   -6.0846    5.6565
M  END
